# Supplementary material for: Exploring the Rumen Microbiota and Serum Metabolite Profile of Hainan Black Goats with Different Body Weights before Weaning
Source: MDPI journal article supplement (doi:10.3390/ani14030425), 2024-01-28
Supplement: s1 [file s1]

## Supplementary File – for Online Publication Only

**Supplemental Table S1.** Composition and nutrient levels of the basal diet ( DM basis).

| Ingredients                      | Mix concentrates | Mix coarse materials |
|----------------------------------|------------------|----------------------|
| Corn %                           | 25.68            | -                    |
| Soybean meal %                   | 7.38             | -                    |
| Peanut seedlings %               | 7.33             | -                    |
| Wheat bran %                     | 7.31             | -                    |
| Premix <sup>1</sup> %            | 1.0              | -                    |
| NaCl %                           | 0.73             | -                    |
| Na <sub>2</sub> O <sub>3</sub> % | 0.57             | -                    |
| King grass %                     | -                | 22.25                |
| Whole corn %                     | -                | 20.37                |
| King grass silage %              | -                | 7.38                 |
| Total %                          | 50.0             | 50.0                 |
| Nutrient levels <sup>2</sup>     |                  |                      |
| Dry matter %                     | 88.63            | 26.93                |
| Ash %                            | 6.27             | 7.58                 |
| Crude protein %                  | 14.21            | 3.98                 |
| Ether extract %                  | 4.73             | 3.85                 |
| Neutral detergent fibers %       | 14.33            | 67.33                |
| Acid detergent fibers %          | 4.35             | 45.35                |
| Ca %                             | 0.62             | 0.81                 |
| P %                              | 0.47             | 0.33                 |
| Metabolic energy (MJ/kg)         | 16.61            | 10.36                |

<sup>1</sup> The premix provided the following per kg of the diet: VA 9 000 IU, VD 3 000 IU, VE 50 IU, Cu 15 mg, Fe 700 mg, Mn 500 mg, Zn 800 mg, I 1.0 mg, Se 7.0 mg, Co 20 mg, Ca 14 g, P 1.0 g.

<sup>2</sup> Metabolic energy was a calculated value, while the others were measured values.

**Supplementary Table S2.** Differences in rumen morphology of goat kids with different body weight.

| Items                       | Group <sup>1</sup> |        | SEM    | <i>P</i> -value |
|-----------------------------|--------------------|--------|--------|-----------------|
|                             | HBW                | LBW    |        |                 |
| Papillae length (µm)        | 1232.57            | 656.36 | 137.15 | 0.016           |
| Papillae width (µm)         | 742.06             | 563.33 | 47.11  | 0.042           |
| Muscle layer thickness (µm) | 338.53             | 314.82 | 38.89  | 0.564           |
| Rumen weight (g)            | 120.13             | 90.24  | 0.04   | 0.178           |

<sup>1</sup>HBW = high body weight; LBW= low body weight.

**Supplementary Table S3.** The serum biochemical indicators of LBW and HBW goat kids.

| Items <sup>1</sup> | Group <sup>2</sup> |        | SEM    | <i>P</i> -value |
|--------------------|--------------------|--------|--------|-----------------|
|                    | HBW                | LBW    |        |                 |
| TP (g/dL)          | 6.66               | 6.72   | 0.19   | 0.961           |
| Albumin (g/dL)     | 3.29               | 3.41   | 0.21   | 0.787           |
| Globulin (g/dL)    | 3.66               | 3.10   | 1.58   | 0.621           |
| BUN (mg/dL)        | 45.65              | 49.91  | 9.73   | 0.938           |
| Glucose (mg/dL)    | 59.94              | 47.52  | 14.49  | 0.050           |
| TC (mg/dL)         | 52.04              | 44.23  | 10.21  | 0.046           |
| TG (U/L)           | 2.90               | 2.53   | 0.29   | 0.042           |
| LDH (U/L)          | 345.00             | 396.41 | 58.74  | 0.411           |
| ALT (U/L)          | 22.81              | 16.84  | 7.02   | 0.424           |
| AST (U/L)          | 78.62              | 94.02  | 15.73  | 0.352           |
| ALP (U/L)          | 283.82             | 289.60 | 121.30 | 0.368           |

<sup>1</sup>TP, total protein; BUN, blood urea nitrogen; TC, total cholesterol; TG, triglyceride; LDH, lactate dehydrogenase; ALT, alanine transaminase; AST, aspartate transaminase; ALP, alkaline phosphatase.

<sup>2</sup>HBW = high body weight; LBW= low body weight.

**Supplementary Table S4.** Valid operational taxonomic units (OTUs) and  $\alpha$ -diversity diversity indices of rumen microbiota in HBW and LBW goat kids.

| Items   | Group <sup>1</sup> |         | SEM    | <i>P</i> -value |
|---------|--------------------|---------|--------|-----------------|
|         | HBW                | LBW     |        |                 |
| OTUs    | 4162               | 2905    | 208.60 | 0.042           |
| Chao1   | 5974.39            | 4309.08 | 253.91 | 0.025           |
| Shannon | 31.32              | 26.16   | 0.99   | 0.046           |
| Simpson | 4.74               | 4.47    | 0.05   | 0.171           |

<sup>1</sup>HBW = high body weight; LBW= low body weight.
